# Supplementary material for: A gold nanobipyramid-based photothermal reagent with functions of targeting and activatable fluorescence labeling for visual photothermal therapy
Source: Royal Society of Chemistry journal article supplement (doi:10.1039/d2ma00456a), 2022-01-01
Supplement: d2ma00456a1.pdf [file d2ma00456a1.pdf]

## **Gold nanobipyramids-based photothermal reagent with functions of targeting and activatable fluorescence labeling for a visual photothermal therapy**

Xueke Wu, ‡<sup>a,b</sup> Chenyuan Yan, ‡<sup>a,b</sup> Lixuan Mu, \*<sup>a</sup> Yuan Wang, <sup>a,b</sup> Guangwei She, <sup>a</sup> and Wensheng Shi<sup>\*a,b,c</sup>

*<sup>a</sup>Key Laboratory of Photochemical Conversion and Optoelectronic Materials, Technical Institute of Physics and Chemistry, Chinese Academy of Sciences, Beijing 100190, China*

*<sup>b</sup>University of Chinese Academy of Sciences, Beijing 100049, China*

*<sup>c</sup>Ganjiang Innovation Academy, Chinese Academy of Sciences, Ganzhou 341000, China*

\*E-mail: [mulixuan@mail.ipc.ac.cn](mailto:mulixuan@mail.ipc.ac.cn), [shiws@mail.ipc.ac.cn](mailto:shiws@mail.ipc.ac.cn)

‡ Both authors contributed equally to this work

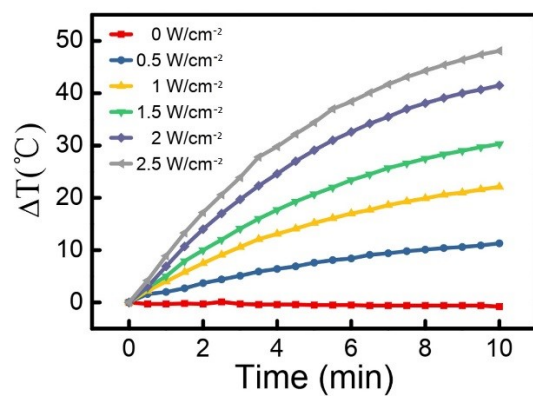

Fig.S1 Temperature dependences of aqueous solution containing the AuNBPs of  $30 \mu\text{g}\cdot\text{mL}^{-1}$  with the irradiation time of 808 nm lasers under different power density of laser irradiation

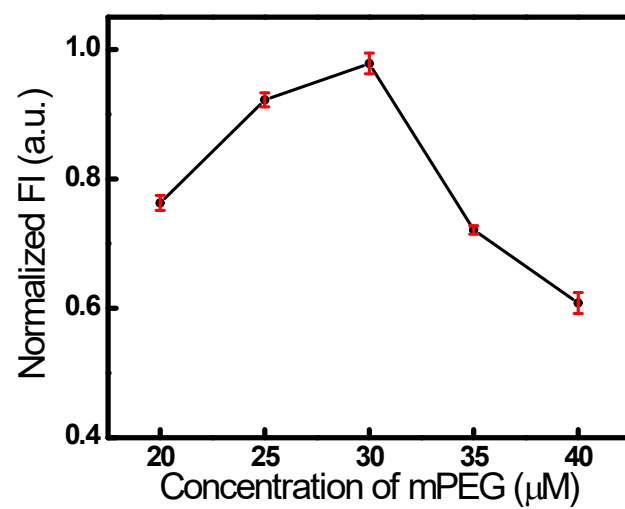

Fig.S2 The normalized fluorescence intensity of AuNBPs-mPEG/AA-TR ( $80 \mu\text{g}\cdot\text{mL}^{-1}$ , 2mL) with different concentrations of the mPEG added in the reaction system (repeated for three times in parallel).

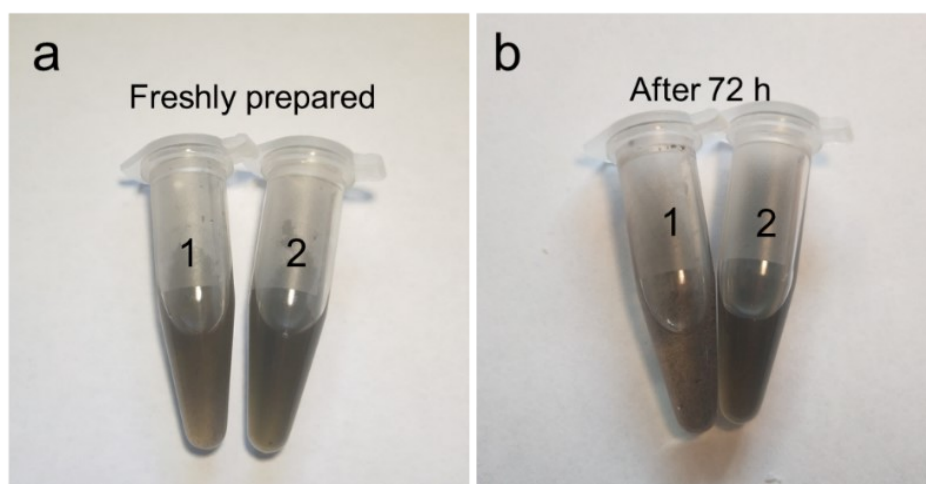

Fig.S3 The photographs of AuNBPs-AA-TR and AuNBPs-mPEG/AA-TR: a) freshly prepared, b) after standing for 48 h. (1, 2 represent AuNBPs-AA-TR and AuNBPs-mPEG/AA-TR respectively)

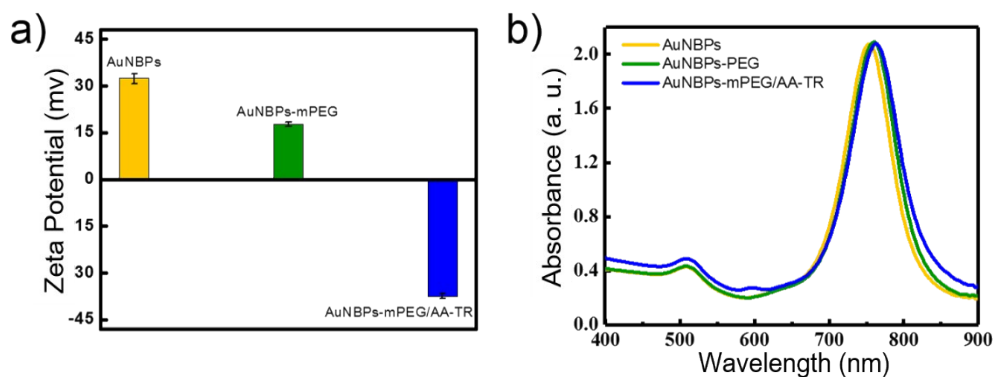

Fig.S4 a) The zeta potential and b) Ultraviolet-visible absorption spectra of the AuNBPs, AuNBPs-mPEG and AuNBPs-mPEG/AA-TR.

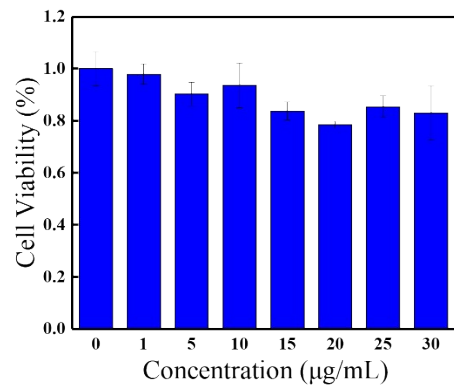

Fig.S5. The cytotoxicity of AuNBPs-mPEG/AA-TR to normal cell ( L929 )

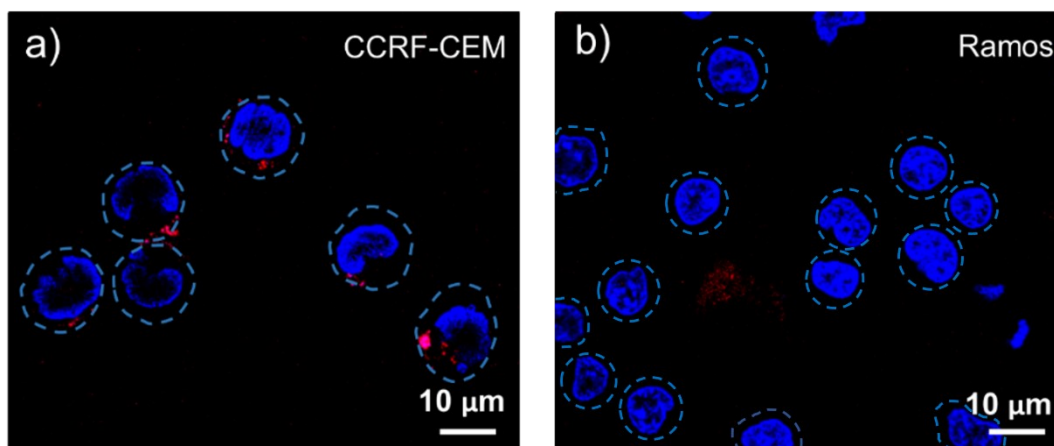

Fig.S6 Fluorescence images of a) CCRF-CEM cells and b) Ramos cells after incubated with AuNBPs-mPEG/AA-TR. The average fluorescence intensity of each cell in red channel in a) is 9.7 times than that in b).

Table S1 Names and sequences of the oligonucleotides used in this study.

| Name                    | DNA Sequence (5'-3')                                                                                                                                                            |
|-------------------------|---------------------------------------------------------------------------------------------------------------------------------------------------------------------------------|
| AA <sub>(16T)</sub> -TR | 5'-SH-CTAACCGT <span style="color: green;">TTTTTTTTTTTTTTTT</span> TATCTAACTGCTGCGCCG<br>CCGGGAAAATACTGTACGGTTAGA-TR-3'                                                         |
| AA <sub>(32T)</sub> -TR | 5'-SH-CTAACCGT <span style="color: green;">TTTTTTTTTTTTTTTTTTTTTTTTTTTTTTTT</span> TATCT<br>AACTGCTGCGCCGCGGGAAAATATGTACGGTTAGA-TR-3'                                           |
| AA <sub>(40T)</sub> -TR | 5'-SH-CTAACCGT <span style="color: green;">TTTTTTTTTTTTTTTTTTTTTTTTTTTTTTTTTTTT</span><br><span style="color: green;">TTT</span> TATCTAACTGCTGCGCCGCGGGAAAATATGTACGGTTAGA-TR-3' |
| Lib                     | 5'-SH-ATCCAGAGTGACGCAGCANNNNNNNNNNNNNNNNNNNNNN<br>NNNNNNNNNNNNNNNNNNNNNNNNNTGGACACGGTGGCTTAGT-TR-3'                                                                             |

N represents A, T, C or G base, and TR represents Tex Red fluorophore.
